# Supplementary material for: Mapping Invasion Potential of the Pest from Central Asia, Trypophloeus klimeschi (Coleoptera: Curculionidae: Scolytinae), in the Shelter Forests of Northwest China
Source: MDPI journal article supplement (doi:10.3390/insects12030242), 2021-03-12
Supplement: s1 [file s1]

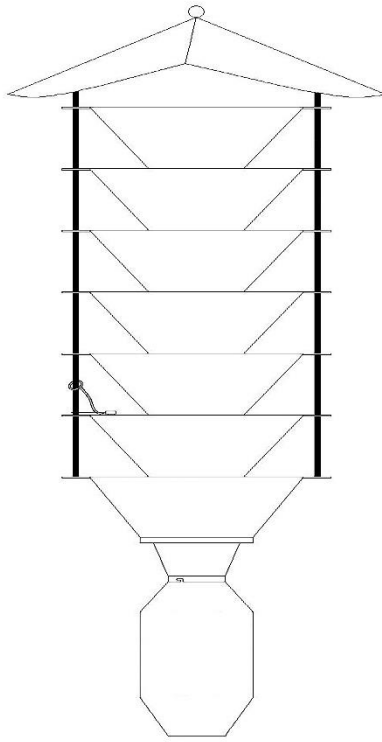

**Figure 1.** Schematic diagram of the trap.
